# Supplementary material for: Biocompatible nanomicelles for sensitive detection and photodynamic therapy of early-stage cancer
Source: Royal Society of Chemistry journal article supplement (doi:10.1039/d1bm00847a), 2021-01-01
Supplement: d1bm00847a1.pdf [file d1bm00847a1.pdf]

## Supporting Information

### **Biocompatible nanomicelles for sensitive detection and photodynamic therapy of early-stage cancer**

*Hailin Zhou, Zhongyuan Qi, Pei Pei, Wenhao Shen, Yanxiang Zhang, Kai Yang, Liang Sun\* and Teng Liu\**

State Key Laboratory of Radiation Medicine and Protection, School of Radiation Medicine and Protection & School for Radiological and Interdisciplinary Sciences (RAD-X), Collaborative Innovation Center of Radiation Medicine of Jiangsu Higher Education Institutions, Soochow University, Suzhou 215123, Jiangsu, China.

E-mail: slhmz666@suda.edu.cn, tliu13@suda.edu.cn

### **Content**

**Figure S1.** Zeta potential of free-bond F127 and F127-PPa nanomicelles.

**Figure S2.** The singlet oxygen production ability of F127, PPa and F127-PPa nanomicelles under laser irradiation.

**Figure S3.** The relative cell viabilities after incubation with F127 and 690-nm laser irradiation.

**Figure S4.** PA images and intensity of F127-PPa nanomicelle solutions.

**Figure S5.** The photos of representative mice in each group at different timepoints.

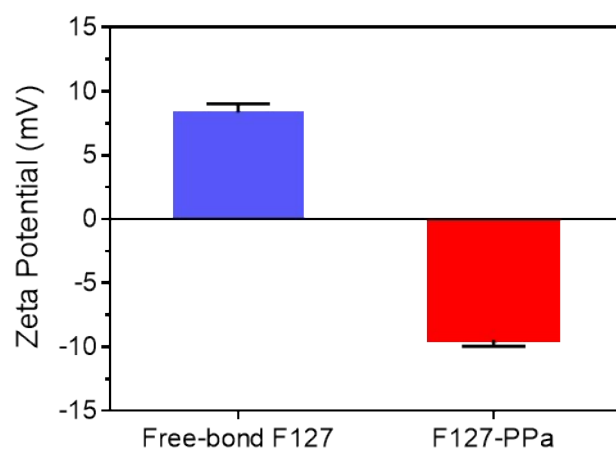

**Figure S1.** Zeta potential of free-bond F127 and F127-PPa nanomicelles.

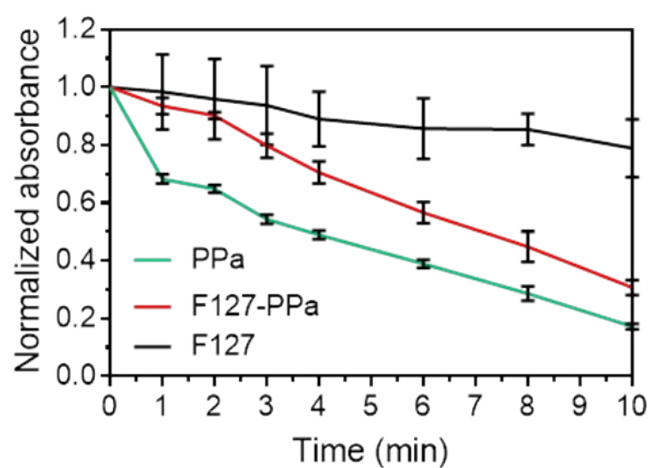

**Figure S2.** The singlet oxygen production ability of F127, PPa and F127-PPa nanomicelles under laser irradiation tested by 1,3-diphenylisobenzofuran (DPBF).

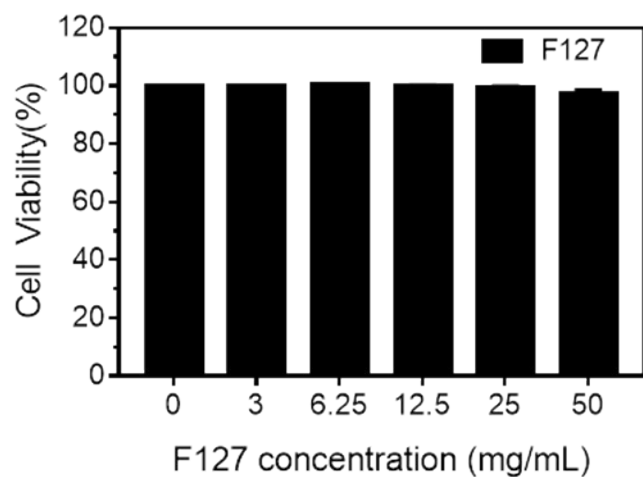

**Figure S3.** The relative cell viabilities of 4T1 cells after incubation with F127 and 690-nm laser irradiation for 10 min.

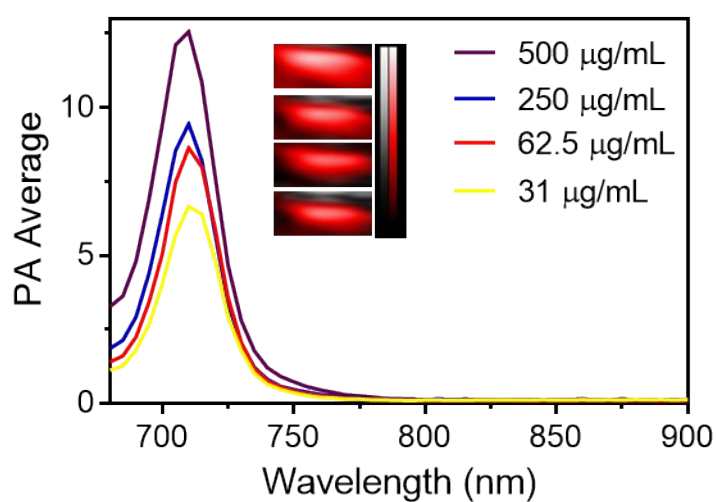

**Figure S4.** PA images of F127-PPa nanomicelles with different concentration and the related signal intensity excited by pulsed laser at the region of 680-900 nm.

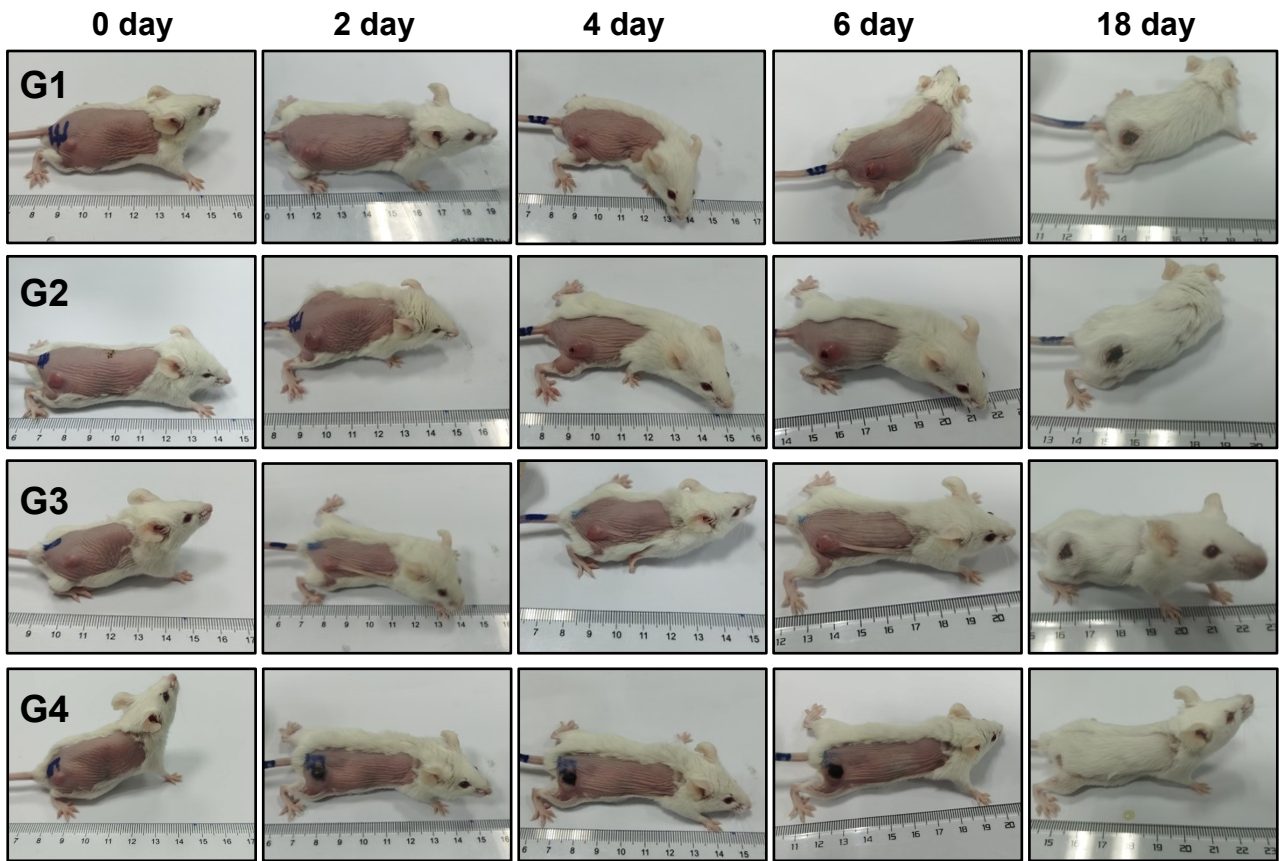

**Figure S5.** The photos of representative mice in each group at different timepoints. G1: F127-PPa micelles only; G2: laser irradiation only; G3: control group with PBS only; and G4: PDT group with F127-PPa micelles injection plus laser irradiation.
